# 1 **European Primary Forest Database (EPFD) v2.0**

## 2 *Authors*

3 Francesco Maria Sabatini<sup>1,2†</sup>; Hendrik Bluhm<sup>3</sup>; Zoltan Kun<sup>4</sup>; Dmitry Aksenov<sup>5</sup>; José A. Atauri<sup>6</sup>;  
4 Erik Buchwald<sup>7</sup>; Sabina Burrascano<sup>8</sup>; Eugénie Cateau<sup>9</sup>; Abdulla Diku<sup>10</sup>; Inês Marques Duarte<sup>11</sup>;  
5 Ángel B. Fernández López<sup>12</sup>; Matteo Garbarino<sup>13</sup>; Nikolaos Grigoriadis<sup>14</sup>; Ferenc Horváth<sup>15</sup>;  
6 Srđan Keren<sup>16</sup>; Mara Kitenberga<sup>17</sup>; Alen Kiš<sup>18</sup>; Ann Kraut<sup>19</sup>; Pierre L. Ibisch<sup>20</sup>; Laurent  
7 Larrieu<sup>21,22</sup>; Fabio Lombardi<sup>23</sup>; Bratislav Matovic<sup>24</sup>; Radu Nicolae Melu<sup>25</sup>; Peter Meyer<sup>26</sup>; Rein

---

## *Affiliations*

<sup>1</sup> German Centre for Integrative Biodiversity Research (iDiv) - Halle-Jena-Leipzig, Germany  
francesco.sabatini@botanik.uni-halle.de; ORCID 0000-0002-7202-7697

<sup>2</sup> Martin-Luther-Universität Halle-Wittenberg, Institut für Biologie. Am Kirchtor 1, 06108 Halle,  
Germany

<sup>3</sup> Humboldt-Universität zu Berlin, Geography Department, Unter den Linden 6, 10099, Berlin,  
Germany. hendrik.bluhm@geo.hu-berlin.de. 0000-0001-7809-3321

<sup>4</sup> Frankfurt Zoological Society

<sup>5</sup> NGO "Transparent World", Rossolimo str. 5/22, building 1, 119021, Moscow, Russia

<sup>6</sup> EUROPARC-Spain/Fundación Fernando González Bernáldez. ICEI Edificio A. Campus de Somosaguas.  
E28224 Pozuelo de Alarcón, Spain. jose.atauri@redeuroparc.org

<sup>7</sup> The Danish Nature Agency, Gjøddinggård, Førstballevej 2, DK-7183 Randbøl, Denmark; ecb@nst.dk.  
ORCID 0000-0002-5590-6390

<sup>8</sup> Sapienza University of Rome, Department of Environmental Biology, P.le Aldo Moro 5, 00185, Rome,  
Italy. ORCID 0000-0002-6537-3313

<sup>9</sup> Réserves Naturelles de France, La Bourdonnerie, Dijon cedex, France

<sup>10</sup> PSEDA-ILIRIA. Forestry department, Tirana 1000, Albania. adiku@hotmail.com

<sup>11</sup> Centre for Applied Ecology "Professor Baeta Neves" (CEABN), InBIO, School of Agriculture,  
University of Lisbon, Tapada da Ajuda 1349-017 Lisbon, Portugal. inesmarquesduarte@gmail.com;  
ORCID 0000-0002-1524-5487

<sup>12</sup> Parque Nacional de Garajonay. Avda. V Centenario, edif. Las Creces, local 1, portal3, 38800 San  
Sebastian de La Gomera, Tenerife, Spain. aferlop@gobiernodecanarias.org

<sup>13</sup> University of Torino, Department DISAFA L.go Paolo Braccini 2, Grugliasco 10095, Italy.  
matteo.garbarino@unito.it, ORCID 0000-0002-9010-1731

<sup>14</sup> Forest Research Institute, Vassilika, 57006, Thessaloniki, Greece. nikosforest@yahoo.gr

<sup>15</sup> Centre for Ecological Research, Institute of Ecology and Botany, Alkotmány u. 2-4., 2163 Vácátót,  
Hungary. horvath.ferenc@okologia.mta.hu; ORCID 0000-0002-1317-1269

<sup>16</sup> Faculty of Forestry, University of Agriculture in Krakow, aleja 29-Listopada 46, 31-415 Krakow,  
Poland; E-mail: srdan.keren@urk.edu.pl; ORCID 0000-0001-6589-1295

<sup>17</sup> Latvian State Forest Research Institute "Silava", Rigas street 111, Salaspils, Latvia, LV-2169.  
mara.kitenberga@gmail.com ORCID: 0000-0002-6192-988X

<sup>18</sup> Institute for nature conservation of Vojvodina Province, Novi Sad, Serbia. alenkiš73@gmail.com.  
ORCID: 0000-0002-5230-1652

<sup>19</sup> University of Tartu, Institute of Ecology and Earth Sciences, Vanemuise 46, EE-51014 Tartu, Estonia;  
ann.kraut@ut.ee, ORCID: 0000-0002-7403-7565

<sup>20</sup> Centre for Ecomics and Ecosystem Management, Faculty of Forest and Environment, Eberswalde  
University for Sustainable Development, Alfred-Möller-Str. 1, 16225 Eberswalde, Germany,  
pierre.ibisch@hnee.de

<sup>21</sup> Université de Toulouse, INRAE, UMR DYNAMFOR, Castanet-Tolosan, France. laurent.larrieu@inrae.fr.  
ORCID: 0000-0002-9050-0281

<sup>22</sup> CRPF-Occitanie, antenne de Tarbes, place du foirail, 65000 Tarbes, France

- 8 Midteng<sup>27</sup>; Stjepan Mikac<sup>28</sup>; Martin Mikoláš<sup>29, 30</sup>; Gintautas Mozgeris<sup>31</sup>; Momchil Panayotov<sup>32</sup>;  
9 Rok Pisek<sup>33</sup>; Leónia Nunes<sup>34</sup>; Alejandro Ruete<sup>35</sup>; Matthias Schickhofer<sup>36</sup>; Bojan Simovski<sup>37</sup>;  
10 Jonas Stillhard<sup>38</sup>; Dejan Stojanovic<sup>39</sup>; Jerzy Szwagrzyk<sup>40</sup>; Olli-Pekka Tikkanen<sup>41</sup>; Elvin

---

<sup>23</sup> Mediterranean University of Reggio Calabria, Agraria Department, Loc. Feo di Vito, 89122 Reggio Calabria, Italy. fabio.lombardi@unirc.it; ORCID: 0003-0003-3517-5890

<sup>24</sup> University of Novi Sad, Institute of Lowland Forestry and Environment, Antona Cehova 13d, Novi Sad, Serbia. bratislav.matovic@uns.ac.rs

<sup>25</sup> World Wide Fund for nature (CEE), Lunga street 190, Brasov, Romania. rmelu@wwf.ro

<sup>26</sup> Northwest German Forest Research Institute, Department Forest Nature Conservation, Hann. Münden, Germany, peter.meyer@nw-fva.de; ORCID: 0000-0003-4200-4993

<sup>27</sup> Asplan Viak A.S.Kjörboveien 20, postboks 24, N-1300 Sandvika, Norway. rein.midteng@asplanviak.no

<sup>28</sup> University of Zagreb, Faculty of Forestry, Svetosimunska cesta 25, 10000 Zagreb, Croatia. smikac@sumfak.hr, ORCID: 0000-0002-4470-7898

<sup>29</sup> Czech University of Life Sciences, Faculty of Forestry and Wood Sciences, Kamýcka cesta 1176, CZ-16521 Praha6-Suchbát, Czech Republic

<sup>30</sup> PRALES, Odrnovie 563, SK-01322 Rosina, Slovakia

<sup>31</sup> Vytautas Magnus University, K. Donelaičio g. 58, LT-44248 Kaunas, Lithuania, gintautas.mozgeris@vdu.lt, ORCID: 0000-0002-8480-6006

<sup>32</sup> University of Forestry, Dendrology Department, 1756 Sofia, Bulgaria, panayotov.m@lbu.bg; ORCID: 0000-0003-1600-9352

<sup>33</sup> Slovenia Forest Service, Department for forest management planning, Vecna pot 2, 1000 Ljubljana. rok.pisek@zgs.si; ORCID: 0000-0002-8150-1514.

<sup>34</sup> Centre for Applied Ecology "Professor Baeta Neves" (CEABN), InBIO, School of Agriculture, University of Lisbon, Tapada da Ajuda 1349-017 Lisbon, Portugal. lnunes@isa.ulisboa.pt; ORCID 0000-0002-2617-0468

<sup>35</sup> Greensway AB, Ulls väg 24A. 756 51 Uppsala. Sweden. aleruete@gmail.com, ORCID 0000-0001-7681-2812

<sup>36</sup> Freelance forest expert and book author. matthias.schickhofer@supportingchange.org

<sup>37</sup> Ss. Cyril and Methodius University in Skopje, Hans Em Faculty of Forest Sciences, Landscape Architecture and Environmental Engineering, Department of Botany and Dendrology, P.O. Box 235, MK-1000 Skopje, North Macedonia. bsimovski@sf.ukim.edu.mk; ORCID 0000-0003-2905-1971

<sup>38</sup> Swiss Federal Research Institute for Forest, Snow and Landscape Research WSL, Forest Resources and Management, Zürcherstrasse 111, 8903 Birmensdorf, Switzerland, jonas.stillhard@wsl.ch ORCID: 0000-0001-8850-4817

<sup>39</sup> University of Novi Sad, Institute of Lowland Forestry and Environment, Antona Cehova 13d, Novi Sad, Serbia. dejan.stojanovic@uns.ac.rs

<sup>40</sup> Department of Forest Biodiversity, University of Agriculture, Kraków, Poland, rlszwagr@cyf-kr.edu.pl

<sup>41</sup> University of Eastern Finland, School of forest Sciences, Yliopistokatu 7, 80100 Joensuu, Finland. olli-pekka.tikkanen@uef.fi

11 Toromani<sup>42</sup>; Roman Volosyanchuk<sup>43,44</sup>; Tomáš Vrška<sup>45</sup>; Marcus Waldherr<sup>46</sup>; Maxim  
12 Yermokhin<sup>47</sup>; Tzvetan Zlatanov<sup>48</sup>; Asiya Zagidullina<sup>49</sup>; Tobias Kuemmerle<sup>50</sup>  
13  
14 †corresponding author: [francesco.sabatini@botanik.uni-halle.de](mailto:francesco.sabatini@botanik.uni-halle.de)  
15

---

<sup>42</sup> Agricultural University of Tirana, Forestry Department, 1029 Tirana, Albania. [etoromani@ubt.edu.al](mailto:etoromani@ubt.edu.al)

<sup>43</sup> World Wide Fund for nature (WWF) Ukraine, Mushaka 48, Lviv, 79011, Ukraine.  
[volosyanchuk@yahoo.com](mailto:volosyanchuk@yahoo.com)

<sup>44</sup> Ecosphera NGO, Kapushans'ka 82a, Uzhhorod, 88000, Ukraine. [volosyanchuk@yahoo.com](mailto:volosyanchuk@yahoo.com)

<sup>45</sup> Silva Tarouca Research Institute, Department of Forest Ecology, Lidická 25/27, 602 00 Brno, Czech Republic, [tomas.vrska@vukoz.cz](mailto:tomas.vrska@vukoz.cz)

<sup>46</sup> Centre for Ecomics and Ecosystem Management, Faculty of Forest and Environment, Eberswalde University for Sustainable Development, Alfred-Möller-Str. 1, 16225 Eberswalde, Germany.  
[marcus.waldherr@hnee.de](mailto:marcus.waldherr@hnee.de)

<sup>47</sup> Institute of Experimental Botany of the National Academy of Sciences of Belarus, Laboratory of Productivity & Stability of Plant Communities, 220072, Akademicheskaya St. 27, Minsk, Belarus, [maxim.yermokhin@gmail.com](mailto:maxim.yermokhin@gmail.com)

<sup>48</sup> Bulgarian Academy of Sciences, Institute of Biodiversity and Ecosystem Research, 2 Gagarin Street, 1113 Sofia, Bulgaria, [tmzlatanov@gmail.com](mailto:tmzlatanov@gmail.com), ORCID: 0000-0003-4205-3429

<sup>49</sup> Saint-Petersburg State University, Department of Vegetation Science, Saint-Petersburg, Russia, [azagidullina@gmail.com](mailto:azagidullina@gmail.com)

<sup>50</sup> Humboldt-Universität zu Berlin, Geography Department & Integrative Research Institute on Transformation in Human-Environment Systems, Unter den Linden 6, 10099, Berlin, Germany.  
[tobias.kuemmerle@geo.hu-berlin.de](mailto:tobias.kuemmerle@geo.hu-berlin.de); ORCID 0000-0002-9775-142X

## 16 *Abstract*

17           Primary forests are scarce in Europe and continue to disappear at an alarming rate.  
18       Despite these losses, we know little about where such forests still occur. Here, we present an  
19       updated geodatabase and map of Europe's known primary forests. Our geodatabase  
20       harmonizes 51 different datasets of primary forests, and contains 16,897 individual patches  
21       (41.2 Mha) spread across 35 countries. When available, we provide information on each  
22       patch (name, location, naturalness, extent and dominant tree species) and the surrounding  
23       landscape (biogeographical regions, protection status, potential natural vegetation, current  
24       forest extent). To assess the robustness of our geodatabase, we checked each patch for  
25       forest disturbance events using Landsat satellite-image time series (1985-2018). We estimate  
26       that 94% of the patches in our database did not experience significant disturbances that  
27       would alter their primary forest status in the last 30 year. Our database is the most  
28       comprehensive dataset on primary forests in Europe, and will be useful for biogeographic  
29       and ecological studies, and conservation planning to safeguard these unique forests.

30

## 31 *Background & Summary*

32           Primary forests are composed of native tree species without clearly visible  
33       indications of human activity and with intact ecological processes<sup>1,2</sup>. The importance of such  
34       forests is widely recognized<sup>3,4</sup>. First, they provide refuge to forest biodiversity<sup>5</sup>, and act as a  
35       buffer to species loss in human-dominated landscapes<sup>6,7</sup>. Second, primary forests play an  
36       important role in climate change mitigation. At the local scale, they buffer the adverse  
37       effects of increasing temperature on understory biodiversity, as they often have cooler  
38       forest-floor summer temperatures compared to secondary forests<sup>8</sup>. At the global scale they  
39       contribute to climate stability by storing large quantities of carbon, both in the biomass and  
40       in soils<sup>9,10</sup>. Third, primary forests often serve as a reference for developing close-to-nature  
41       forest management, or for benchmarking restoration efforts<sup>11</sup>. Finally, these forests are an  
42       irreplaceable part of our natural heritage, shape the cultural identities of local communities,  
43       and have a high intrinsic value<sup>12</sup>.

44           In Europe, as in many human-dominated regions, most forested area is currently  
45       managed<sup>13</sup>, often with increasing harvest intensities<sup>14,15</sup>. As a result, despite the general  
46       trend of increasing total forest area, primary forests are scarce and continue to disappear<sup>16</sup>.  
47       For instance, Romania hosts some of the largest swaths of primary forest in Central Europe  
48       and faced a sharp increase in logging rates since 2000. This has resulted in significant primary  
49       forest loss, even within protected areas<sup>16-18</sup>. In Poland, the iconic Białowieża Forest was

50 recently in the spotlight after the controversial decision from the Polish National Forest  
51 Holding, now nullified by the Court of Justice of the European Union<sup>19</sup>, to implement salvage  
52 logging followed by tree planting after a bark beetle outbreak<sup>20</sup>. Widespread loss of primary  
53 forests also occurred in Ukraine<sup>21</sup>, Slovakia<sup>22</sup>, or in the boreal North, e.g., in the Russian  
54 North-West, where 4.6 Mha of primary forest were lost since 2001<sup>16,23</sup>. Effective protection  
55 of Europe's primary forests is therefore urgently needed<sup>24</sup>.

56 In the newly released 'Biodiversity Strategy for 2030', the European Commission  
57 emphasized the need to define, map, monitor and strictly protect all of the EU's remaining  
58 primary and old-growth forests<sup>4</sup>. Reaching these objectives requires complete and up-to-  
59 date data on primary forests' location and protection status. Such data could inform both  
60 conservation planning and research, for instance by highlighting areas where primary forests  
61 are either scarce, or poorly studied. Yet, many data gaps remain on the location and  
62 conservation status of EU's primary forests<sup>25</sup>. Only a few countries conducted systematic, on-  
63 the-ground inventories<sup>22,26</sup>. For most countries data are either only available for a few well-  
64 studied forests<sup>27-29</sup>, or are limited to the distribution of potential (=unconfirmed) primary  
65 forests, typically predicted statistically or via remote sensing<sup>30-32</sup>. Despite past efforts for  
66 harmonizing data<sup>33,34</sup>, only recently has the first map of primary forests been released for  
67 Europe<sup>35</sup> together with a first assessment of their conservation status<sup>25</sup>.

68 The first version of our European Primary Forest database (EPFD v1.0) included 32  
69 local-to-national datasets, plus data from a literature review and a survey, resulting in the  
70 mapping of a total of ~1.4 Mha of primary forest<sup>35</sup>. This is only about one fifth of the  
71 estimated 7.3 Mha of undisturbed forest still occurring in Europe, excluding Russia<sup>13</sup>. Here,  
72 we build on those efforts to substantially progress towards a complete EPFD<sup>35</sup>, as well as to  
73 release most of the data open-access. Key improvements of this new database include (a)  
74 filling major regional gaps, including European Russia, the Balkan Peninsula, the Pyrenees  
75 and the Baltic region, (2) mapping 'potential' primary forests for Sweden and Norway, two  
76 key regions where complete inventories are currently unavailable, and (3) updating our  
77 literature review to January 2019.

78 EPFD v2.0 thus aggregates and harmonizes 51 regional-to-continental spatial  
79 datasets, contains 16,897 non-overlapping primary forest patches (plus 299 point features)  
80 covering an area of 41.2 Mha (37.4 Mha in European Russia alone; Figure 1) across 35  
81 countries (Table 1). Potential primary forests for Sweden and Norway account for an  
82 additional 16,311 polygons and 2.5 Mha (Figure 2).

83

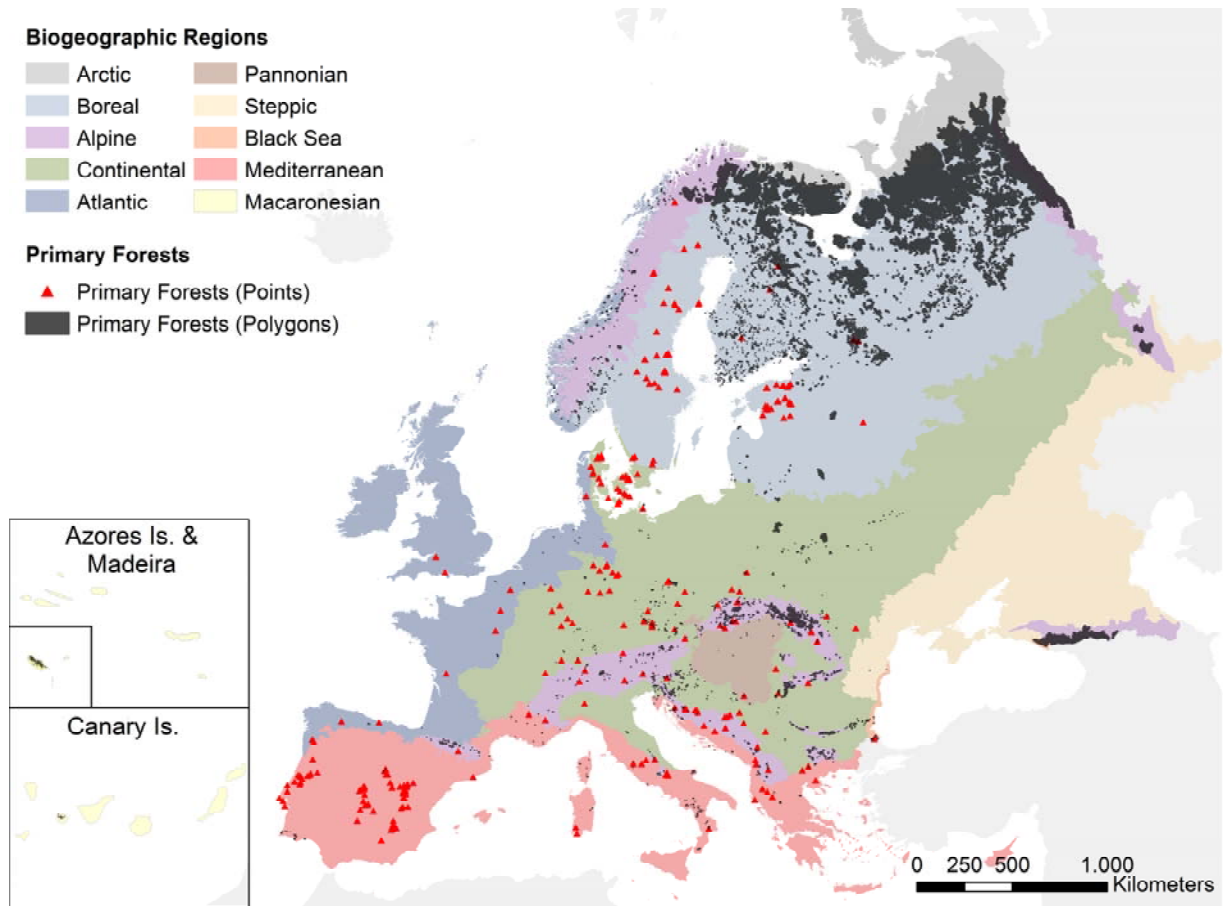

84

85 *Figure 1 - Overview of the primary forest patches contained in the EPFD v2.0. Both points and polygons were*  
86 *magnified to improve visibility.*

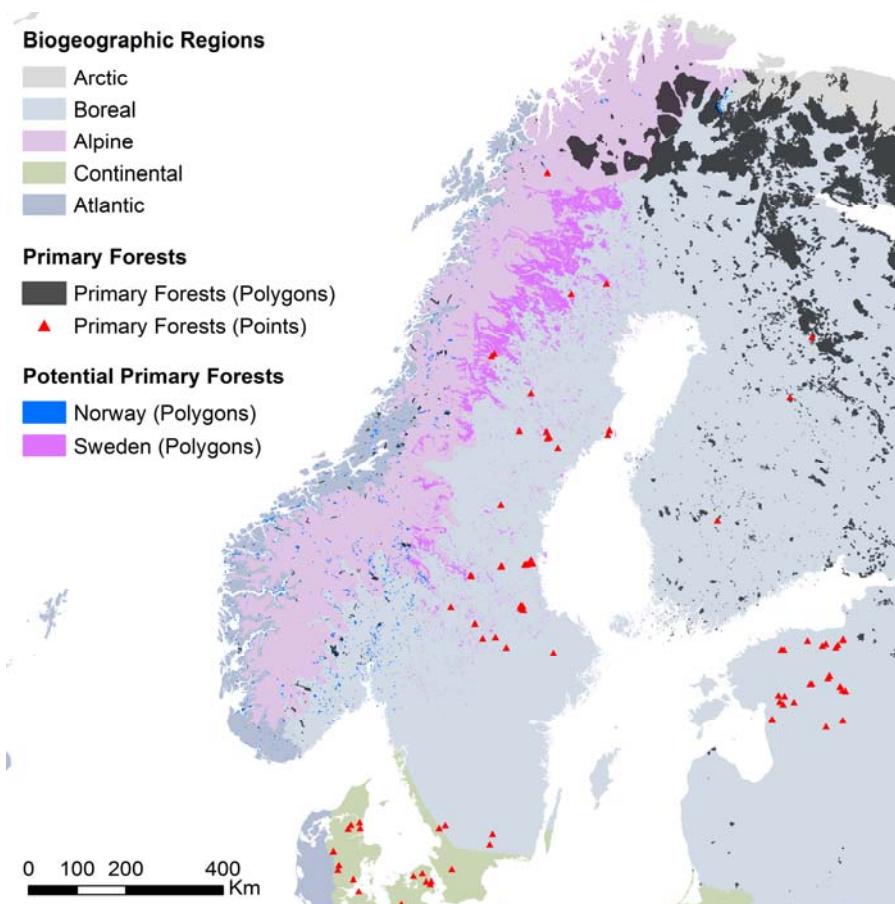

87

88 *Figure 2 - Overview of the maps of potential primary forests of Sweden and Norway.*

89

90 *Table 1 - Summary of primary forest data across European countries. Dataset IDs correspond to those in Table 2.*

91 *\* Some point features have no information on forest patch area.*

| Country                | Num. features<br>(Polygons\<br>Points) | Tot. estimated<br>area<br>(1,000 ha) | Dataset IDs       |
|------------------------|----------------------------------------|--------------------------------------|-------------------|
| Albania                | 15\6                                   | 14.02                                | 0, 1, 34, 47, 54  |
| Austria                | 128\2                                  | 15.25                                | 9, 34, 35, 48, 49 |
| Belarus                | 3\0                                    | 188.29                               | 46                |
| Belgium                | 5\0                                    | 0.27                                 | 34                |
| Bosnia and Herzegovina | 4\12                                   | 4.1                                  | 0, 2, 53          |
| Bulgaria               | 492\2                                  | 57.06                                | 0, 3, 4, 34, 35   |
| Croatia                | 48\3                                   | 9.56                                 | 0, 5, 9, 34       |
| Czechia                | 86\10                                  | 9.07*                                | 0, 6, 9           |
| Denmark                | 0\24                                   | 1.68                                 | 7                 |
| Estonia                | 0\29                                   | 0.05*                                | 0, 8              |
| Finland                | 1,008\3                                | 2,817.36*                            | 0, 12, 38, 39     |
| France                 | 106\7                                  | 10.86*                               | 0, 13, 14, 35, 37 |
| Germany                | 25\21                                  | 13.65*                               | 0, 9, 15, 34, 35  |
| Greece                 | 5\2                                    | 1.75*                                | 0, 16             |

|                    |                   |                   |                          |
|--------------------|-------------------|-------------------|--------------------------|
| Hungary            | 9\0               | 0.35              | 17                       |
| Italy              | 94\12             | 8.53*             | 0, 18, 34, 35, 55        |
| Latvia             | 3\0               | 4.79              | 40                       |
| Lithuania          | 20\0              | 32.05             | 19                       |
| Moldova            | 0\1               | 0.03              | 35                       |
| Montenegro         | 2\0               | 2.85              | 2, 50                    |
| Netherlands        | 3\0               | 0.08              | 36                       |
| North Macedonia    | 5\1               | 0.81              | 1, 20                    |
| Norway             | 240\1             | 280.05*           | 0, 21, 36, 43            |
| Poland             | 70\5              | 24.3*             | 0, 22, 34, 35            |
| Portugal           | 32\21             | 15.75*            | 23, 24                   |
| Romania            | 2,953\6           | 69.48*            | 0, 1, 25, 32, 33, 34, 35 |
| Russian Federation | 3,082\3           | 37,417.69*        | 0, 51                    |
| Serbia             | 14\4              | 7.78              | 0, 35, 36, 44, 45        |
| Slovakia           | 291\4             | 11.54             | 0, 9, 26, 34             |
| Slovenia           | 172\1             | 9.53              | 0, 27, 34                |
| Spain              | 50\58             | 10.29*            | 0, 34, 41, 52            |
| Sweden             | 0\51              | 32.81*            | 0, 29, 35                |
| Switzerland        | 15\5              | 23.1              | 0, 30, 35                |
| Ukraine            | 7,917\3           | 107.57*           | 0, 1, 32, 34             |
| United Kingdom     | 0\2               | 0.1               | 9                        |
| <b>Total</b>       | <b>16,897\299</b> | <b>41,202.45*</b> |                          |

92

93

## 94 *Methods*

95 To define primary forests, we integrated the FAO definition of primary forests<sup>1</sup>, with  
 96 the framework proposed by Buchwald [<sup>36</sup>]. In this framework, the term “primary forest”  
 97 includes all forests where the signs of former human impacts, if any, are strongly blurred due  
 98 to decades (at least 60-80 years) without forestry operations<sup>36</sup>. ‘Primary forests’ is therefore  
 99 an umbrella term to include forests with different levels of naturalness, such as primeval,  
 100 virgin, near-virgin, old-growth and long-untouched forests<sup>36</sup>. Our definition of primary  
 101 forests, therefore, does not imply that these forests were never cleared or disturbed by  
 102 humans, and includes, beside late-successional forests, also early seral stages and young  
 103 forests that originated after natural disturbances and natural regeneration, without  
 104 subsequent management. In case of large forest tracts (>250 ha) with high naturalness, our  
 105 definition also allows forest polygons that include land temporarily or permanently not  
 106 covered by trees.

107 To create the EPFD v2.0, we first expanded and updated the literature review on  
 108 primary forests we had originally carried out for EPFD v1.0<sup>35</sup>, which only considered the  
 109 period 2000-2017, and did not consider European Russia. Specifically, we added all scientific  
 110 studies published between January 2000 and January 2019 for Russia, and those published in



111 2017-2019 for the rest of Europe. We identified relevant publications in the ISI Web of  
112 Knowledge using the search terms “(primary OR virgin OR old-growth OR primeval) AND  
113 forest\*” in the title field. In line with [<sup>35</sup>], we deliberately excluded terms such as  
114 “unmanaged” (meaning: not under active management), “ancient” (never cleared for  
115 agriculture) or “natural” (stocked with naturally regenerated native trees). These terms  
116 indicate conditions that are necessary, but not sufficient for considering a forest as primary.  
117 Finally, we refined our search using geographical and subject filters. The literature search  
118 returned 122 candidate papers. After screening their content, we added 23 additional  
119 primary forest stands (10 in European Russia, 13 in the rest of Europe), from 13 studies (four  
120 from European Russia, and nine from the rest of Europe).

121 Building the EPFD v1.0<sup>35</sup> involved reaching out to 134 forest experts. For v2.0 we  
122 contacted an additional 75 experts with knowledge on forests or forestry, and invited them  
123 to add spatially-explicit data on primary forests to our database. We focussed on experts  
124 from geographical regions poorly covered in v1.0. We received 56 answers, which led to the  
125 incorporation of 20 new datasets in our map. Given the context-dependency of definitions  
126 used in regional mapping projects, new datasets were only included if we could find an  
127 explicit equivalence between country-specific forest definitions and our definition  
128 framework<sup>36</sup>.

129 We integrated all data into a geodatabase, which contains primary forests either as  
130 polygons (if information on the forest boundary was available) or point locations (when  
131 having only a centroid). We set 0.5 hectares as minimum mapping unit. If available, we  
132 included a set of basic descriptors for each patch: name, location, naturalness level (based  
133 on [<sup>36</sup>]), extent, dominant tree species, disturbance history and protection status. In total,  
134 our map harmonized 51 regional-to-continental datasets of primary forests (Table 2).

135 The EPFD is composed of open-access data, and data that we kept confidential,  
136 either for conservation or copyright reasons. All statistics and summaries reported in this  
137 paper concern to the full geodatabase (open-access + confidential data).

138  
139

Table 2 - Synthetic description of datasets retrieved. ID codes are not consecutive. \* Some point features have no information on forest patch area. † Overlapping areas across different datasets are double-counted. Data Regime: OA: Open-Access; Conf: Confidential.

| ID | Dataset name                                                   | Custodian                      | Data Regime | Num. features (Polygons\ Points) | Tot. estimated area (1,000 ha) <sup>†</sup> | Source                                |
|----|----------------------------------------------------------------|--------------------------------|-------------|----------------------------------|---------------------------------------------|---------------------------------------|
| 0  | Literature Review - Primary Forest of Europe                   | Francesco Maria Sabatini       | OA          | 0\106                            | 85.83*                                      | 35                                    |
| 1  | Forest Ecology Group CULS – REMOTE primary forests             | Martin Mikolas                 | OA          | 22\0                             | 1.91                                        | 35,37-39                              |
| 2  | LomJanPerBio                                                   | Matteo Garbarino & Renzo Motta | OA          | 4\0                              | 4.45                                        | 35,40-43                              |
| 3  | WWF - Old-growth forests in Bulgaria                           | Tzvetan Zlatanov               | OA          | 129\0                            | 51.93                                       | 35,44                                 |
| 4  | Coniferous Old-growth forest of Rila and Pirin NP, Bulgaria    | Momchil Panayotov              | OA          | 363\0                            | 3.3                                         | 35,45                                 |
| 5  | Croatian OG forests reserve                                    | Stjepan Mikac                  | OA          | 46\0                             | 7.28                                        | 35                                    |
| 6  | Czech natural forests databank                                 | Dušan Adam; Tomas Vrska        | OA          | 86\0                             | 8.17                                        | 35,46                                 |
| 7  | Old-growth & long untouched forests of Denmark                 | Erik Buchwald                  | OA          | 0\24                             | 1.68                                        | 35                                    |
| 8  | Hemiboreal old-growth forests of Estonia                       | Ann Kraut                      | OA          | 0\23                             | 0.05                                        | 35,47                                 |
| 9  | High Value Beech Forest in Europe                              | Fabio Lombardi                 | OA          | 0\10                             | 0.57                                        | 35,48                                 |
| 12 | Publicly available data on OG forests of Finland               | Olli-Pekka Tikkanen            | OA          | 681\0                            | 2740.5                                      | Derived from [ <sup>49</sup> ];<br>35 |
| 13 | WWF - Hauts lieux de naturalité en France                      | Daniel Vallauri                | OA          | 49\0                             | 0.19                                        | 35,50,51                              |
| 14 | RNF                                                            | Eugénie Cateau                 | OA          | 7\0                              | 5.31                                        | 35,52                                 |
| 15 | Naturwaldreservate & Weltnaturerbe Buchenwälder in Deutschland | Peter Meyer                    | OA          | 24\7                             | 5.81*                                       | 35,53                                 |
| 16 | World Heritage Beech Forests of Europe - Greek candidates      | Nikolaos Grigoriadis           | OA          | 5\0                              | 1.75                                        | 35                                    |
| 17 | Hungarian Forest Reserve monitoring                            | Ferenc Horváth                 | Conf        | 9\0                              | 0.35                                        | 35                                    |
| 18 | Old-growth forests in Italian National Parks                   | Sabina Burrascano              | OA          | 67\0                             | 3.58                                        | [ <sup>35,54</sup> ] +<br>Unpublished |

|    |                                                                                          |                                        |      |        |        |                                                                                          |
|----|------------------------------------------------------------------------------------------|----------------------------------------|------|--------|--------|------------------------------------------------------------------------------------------|
| 19 | Long-untouched forests in Lithuania                                                      | Gintautas Mozgeris                     | OA   | 20\0   | 32.05  | 35                                                                                       |
| 20 | PriMaFor - Primary forests in Mavrovo NP                                                 | Bojan Simovski                         | OA   | 4\1    | 0.68   | 35                                                                                       |
| 21 | Old-growth forests in Norway outside protected areas                                     | Rein Midteng                           | OA   | 50\0   | 106.29 | 35,55                                                                                    |
| 22 | Database of old-growth forests of Poland                                                 | Jerzy Szwagrzyk                        | OA   | 66\0   | 20.87  | 35                                                                                       |
| 23 | Natural forest areas in Portugal                                                         | Inês Marques Duarte                    | OA   | 31\21  | 1.11*  | 35                                                                                       |
| 24 | Natural forest areas in Portuguese Macaronesia region‡                                   | Leónia Nunes                           | OA   | 1\0    | 14.64  | 35                                                                                       |
| 25 | WWF - Lemnocontrolat                                                                     | Radu Melu                              | OA   | 3179\0 | 46.68  | 35,56                                                                                    |
| 26 | PRALES Database                                                                          | Juraj Vysoky                           | OA   | 290\0  | 10.58  | 22,35,57                                                                                 |
| 27 | Graficni prikaz gozdnih rezervatov                                                       | Rok Pisek                              | OA   | 170\0  | 9.51   | 35,58                                                                                    |
| 29 | Dynamic edge effects on Boreal forest                                                    | Alejandro Ruete                        | OA   | 0\31   | 0.97   | 35,59                                                                                    |
| 30 | Strict Forest Reserves in Switzerland                                                    | Jonas Stillhard                        | Conf | 10\0   | 20.81  | 35,60,61                                                                                 |
| 32 | WWF - Identified old-growth forests of Ukrainian Carpathians and Polissia                | Roman Volosyanchuk, Andriy Plyha       | OA   | 9068\0 | 97.86  | 35,62                                                                                    |
| 33 | Official Romanian catalogue of virgin and quasi-virgin forests                           | Romanian Ministry of Forest and Waters | OA   | 1287\0 | 19     | 63                                                                                       |
| 34 | Ancient and Primeval Beech Forests of the Carpathians and Other Regions of Europe        | UNESCO                                 | Conf | 77\0   | 87.29  | 35,64,65                                                                                 |
| 35 | European Beech Forest Network (EBFN) sites                                               | Marcus Waldherr, Pierre Ibisch         | OA   | 0\32   | 28.29* | Unpublished                                                                              |
| 36 | OGF Collection                                                                           | Francesco Maria Sabatini               | OA   | 8\0    | 29.48  | NL <sup>66</sup> ; RS <sup>67</sup> ; NO - Norwegian Environment Agency <sup>68,69</sup> |
| 37 | Inventory of both ancient and mature forests on the northern slope of the Pyrenees_GEVFP | Laurent Larrieu                        | OA   | 51\0   | 3.25   |                                                                                          |
| 38 | Kainuun vanhat metsät                                                                    | Matti Liimatainen                      | OA   | 123\0  | 6.43   | Unpublished                                                                              |
| 39 | Kansallisomaisuus turvaan                                                                | Paloma Hannonen                        | OA   | 204\0  | 71.18  | <sup>70</sup>                                                                            |
| 40 | Natural forests in Latvia                                                                | Mara Kitenberga                        | OA   | 3\0    | 4.79   | 71-73                                                                                    |

|    |                                                                                                                        |                                        |      |        |          |             |
|----|------------------------------------------------------------------------------------------------------------------------|----------------------------------------|------|--------|----------|-------------|
| 41 | Garajonay                                                                                                              | Ángel B. Fernández López               | OA   | 85\0   | 2.4      | 74-76       |
| 43 | Foreslätte verneområder                                                                                                | Rein Midteng                           | OA   | 200\0  | 196.73   | 77          |
| 44 | Serbia Beech OGF                                                                                                       | Bratislav Matović;<br>Dejan Stojanović | OA   | 5\0    | 0.15     | 78          |
| 45 | Protected virgin & old growth forests in the Pannonian biogeographical region in Serbia                                | Alen Kiš                               | OA   | 8\0    | 0.65     | 79          |
| 46 | Forest-mire ecosystems in Belovezhskaya pushcha National Park, Berezinski biosphere reserve, Olmany reserve in Belarus | Maxim Yermokhin                        | OA   | 3\0    | 188.29   | Unpublished |
| 47 | Albanian Primary Forests                                                                                               | Elvin Toromani                         | OA   | 0\4    | 0.65     | Unpublished |
| 48 | Potential OGF and primary forest in Austria                                                                            | Matthias Schickhofer                   | Conf | 120\0  | 8.44     | Unpublished |
| 49 | Suspected Primeval Forests of the Kalkalpen Nationalpark                                                               | Simone Mayrhofer                       | OA   | 34\0   | 0.45     | Unpublished |
| 50 | VF Montenegro                                                                                                          | Stjepan Mikac                          | OA   | 2\0    | 1.65     | Unpublished |
| 51 | Primary Forests of European Russia                                                                                     | Dmitry Aksenov;<br>Asiya Zagidullina   | OA   | 3084\0 | 37417.69 | 16,80,81    |
| 52 | Red de Rodales de Referencia (Network of Reference Stands)                                                             | Jose A. Atauri                         | OA   | 0\54   | 0.89     | 82          |
| 53 | Primary forests in Bosnia                                                                                              | Srđan Keren                            | OA   | 0\9    | 0.72     | Unpublished |
| 54 | Old beech forest in Albania                                                                                            | Abdulla Diku                           | OA   | 13\0   | 12.7     | 83          |
| 55 | Network of old-growth forests in southern Apennine National Parks                                                      | Sabina Burrascano                      | OA   | 19\0   | 2.78     | 84          |

140 ‡ this dataset belongs to the Regional Forest Service of Madeira

## 141 *Post-Processing*

142 To provide common descriptions for all features contained in the geodatabase, we  
143 integrated the basic descriptors detailed above with a range of attributes derived by  
144 intersecting all polygons or points with layers of: 1) biogeographical regions, 2) protected  
145 areas, 3) forest type, and 4) forest cover.

146 Overlaying the map of biogeographical region<sup>85</sup> returned ten classes: 1. Alpine, 2.  
147 Arctic, 3. Atlantic, 4. Black Sea, 5. Boreal, 6. Continental, 7. Macaronesia, 8. Mediterranean,  
148 9. Pannonian, 10. Steppic. Information on protection status and time since onset of  
149 protection was based on the World Database of Protected Areas (WDPA)<sup>86</sup>. We simplified  
150 the original IUCN classification to three classes: 1. strictly protected – (IUCN category I); 2.  
151 protected – (IUCN categories II-VI + not classified); 3. not protected. We considered a  
152 primary forest patch as protected if >75% of its surface was within a WDPA polygon. When  
153 better information on the protection status of a forest patch was available directly from data  
154 contributors, we gave priority to this source. Forest type was based on the 14 forest  
155 categories defined by the European Environmental Agency<sup>75</sup>. The spatial information was  
156 derived by simplifying the map of Potential Vegetation types for Europe<sup>87</sup>, after creating a  
157 cross-link table<sup>25</sup>. The 13 categories comprise: 1. Boreal forest; 2. Hemiboreal forest and  
158 nemoral coniferous and mixed broadleaved-coniferous forest; 3. Alpine coniferous forest; 4.  
159 Acidophilous oakwood and oak-birch forest; 5. Mesophytic deciduous forest; 6. Lowland to  
160 submountainous beech forest; 7. Mountainous beech forest; 8. Thermophilous deciduous  
161 forest; 9. Broadleaved evergreen forest; 10. Coniferous forests of the Mediterranean,  
162 Anatolian and Macaronesian regions; 11. Mire and swamp forest; 12. Floodplain forest; 13.  
163 Non-riverine alder, birch or aspen forest. For each primary forest patch, we reported the  
164 two most common forest categories. Finally, we extracted for each polygon the actual share  
165 covered by forest. We did this, because larger primary forest polygons in high naturalness  
166 classes can encompass land temporarily or permanently not covered by trees. We used a  
167 tree cover density map for the year 2010 for these regions from [<sup>88</sup>]. All post-processing was  
168 performed in R (v3.6.1)<sup>89</sup>.

169

## 170 *Data Gaps*

171 To assess the completeness of our map, we calculated the ratio between the area of primary  
172 forest in our database at country level, and the estimated area of “forest undisturbed by  
173 man” from the indicator 4.3 in the Forest Europe report<sup>90</sup>. Although the definition of “forest  
174 undisturbed by man” in [<sup>90</sup>] is consistent with our definition of primary forest, it must be  
175 noted that these country-level estimates stem from national inventories or studies based on

176 different interpretations, and the data quality varies from country to country. The  
177 comparison presented here should, therefore, be taken with caution (Figure 3).

178 Forest Europe reports no primary forest for some western European countries  
179 (Spain, France, Belgium, Netherlands, Germany, United Kingdom and Ireland), although for  
180 most of these countries we did find information on at least a handful of primary forest sites.  
181 The coverage of our map was also higher than expected for some Eastern European  
182 countries (e.g., Ukraine, Belarus, Lithuania), as well as Norway and Finland, known for hosting  
183 large areas of primary forests. Data completeness was lower for some central European  
184 countries (Austria, Czechia, Slovakia, Poland and Romania), where our data only accounted  
185 for 20-100% of the country-level estimates from [90]. The largest data gaps were in Sweden,  
186 Italy, Bulgaria, Estonia, Denmark and Russia, where our map accounted for less than 10% of  
187 the primary forest reported in [90]. The low data completeness found for Denmark likely  
188 depends on the inclusion of minimum-intervention forest reserves in [83] that were  
189 harvested until then and therefore do not qualify as primary forests according to our  
190 definition.

191

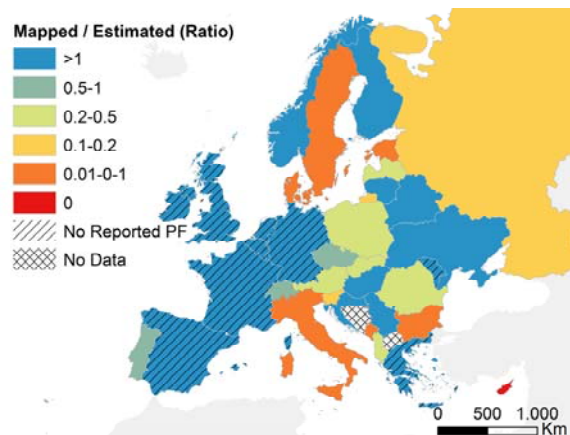

192

193

194 *Figure 3 – Estimation of data completeness. Ratio between the total primary forest area in the EPFD v2.0 and the*  
195 *country estimate of 'forest undisturbed by man' (indicator 4.3) from Forest Europe<sup>90</sup>. Parallel hatching represents*  
196 *countries where Forest Europe reports either no forest undisturbed by man ('No Reported PF'), or where data on*  
197 *forests undisturbed by man are missing ('No Data').*

198

### 199 *Potential Primary forests of Sweden and Norway*

200 For Sweden and Norway, where abundant geographic information was available on forest  
201 distribution, we created maps of potential (yet unconfirmed) primary forests, as a way to  
202 complement our map. For Sweden, we derived a workflow to create a map of potential

203 primary forests as detailed in Figure 4Error! Reference source not found.. This yielded  
204 14,300 polygons covering a total area of 2.4 Mha.  
205

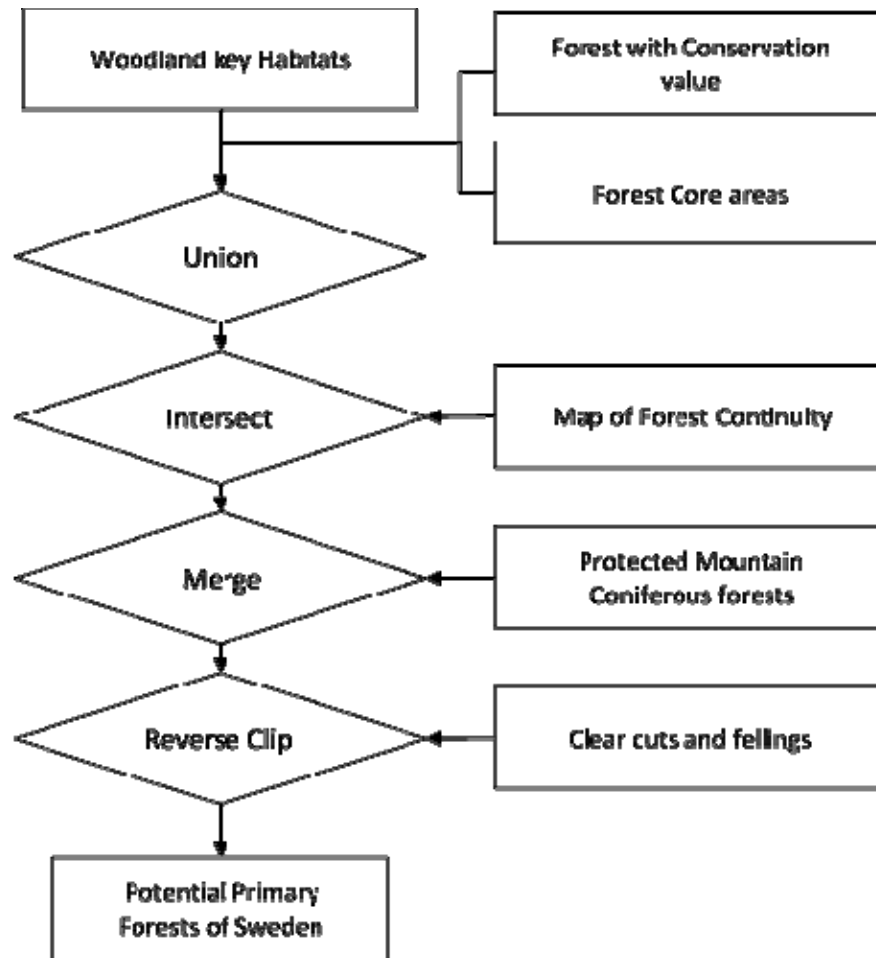

206  
207 *Figure 4 - Workflow and data sources for the map of potential primary forests in Sweden. Data on woodland key*  
208 *habitats derive from [91,92]; forest with conservation value from [93,94], forest core areas from [95], continuity*  
209 *forests from [96,97], protected mountain coniferous forests from [98], clear cuts and fellings from [99].*

210

211

212 For Norway, even though we were able to include two datasets of confirmed primary  
 213 forests, additional primary forest is expected to exist. Therefore, we derived a map of  
 214 potential primary forests, based on the “*Viktige Naturtyper*” dataset from the Norwegian  
 215 Environment Agency<sup>100</sup>, which maps different habitat types of high conservation value both  
 216 inside and outside forested areas. We extracted all polygons larger than 10 ha classified as  
 217 “*old forest types*” (=“*gammelskog*”), i.e., forests that have never been clearcut and are in age  
 218 classes of 120 years or older. This yielded 2,103 polygons covering a total area of 0.1 Mha.  
 219

## 220 *Data Records*

221 The EPFD v2.0 is composed of 51 individual datasets (Table 2), which we harmonized into  
 222 two aggregated feature classes, after excluding all duplicated\overlapping polygons across  
 223 individual datasets, as well as confidential features.

### 224 1) EU\_PrimaryForests\_Polygons\_OA\_v20

225  Composite feature class combining the forest patches classified as “primary  
 226 forest” based on polygon data sources described in Table 2

227  Data type: Polygon Feature Class

### 228 2) EU\_PrimaryForests\_Points\_OA\_v20

229  Composite feature class combining forest locations classified as “primary  
 230 forest”, based on point data sources described in Table 2. Only points not  
 231 overlapping with polygons in (1) reported.

232  Data type: Point Feature Class

233 The individual datasets are also included in the geodatabase, inside the feature dataset  
 234 ‘*European\_PrimaryForests*’. The dataset is stored in Figshare (*a link will be provided after*  
 235 *submission*). The file format is ESRI personal geodatabase (.mdb). Each feature class in the  
 236 geodatabase follows the structure described in Table 3.

237

238

239 *Table 3 - Spatial attributes of the feature classes of primary forests. † - Only for point feature classes.*

| Variable Name     | Variable_type | Description and possible values                                                        |
|-------------------|---------------|----------------------------------------------------------------------------------------|
| OBJECTID          | Object ID     |                                                                                        |
| FOREST_NAME       | Text          | Name of the forest stand (if applicable, otherwise can be name of the wider area)      |
| LOCATION          | Text          | Municipality, Protected Area, or Region in which the primary forest remnant is located |
| NATURALNESS_LEVEL | Short Integer | Naturalness level according to [ <sup>39</sup> ]; Possible values: 10 = n10 -          |



|                                            |               |                                                                                                                                                                                                                                                                                                                                                                                                                                              |
|--------------------------------------------|---------------|----------------------------------------------------------------------------------------------------------------------------------------------------------------------------------------------------------------------------------------------------------------------------------------------------------------------------------------------------------------------------------------------------------------------------------------------|
|                                            |               | Primeval Forest; 9 = n9 - Virgin Forest; 8 = n8 - Frontier Forest; 7 = n7 - Near-virgin Forest; 6 = n6 - Old-growth Forest; 5 = n5 - Long Untouched Forest; 0 = UNKNOWN                                                                                                                                                                                                                                                                      |
| <b>FOREST_EXTENT_MEASURED<sup>‡</sup></b>  | Float         | The total extent of the primary forest patch in hectares. This field is only relevant when a polygon feature IS NOT available for the forest patch.                                                                                                                                                                                                                                                                                          |
| <b>FOREST_EXTENT_ESTIMATED<sup>‡</sup></b> | Short Integer | The order of magnitude of the extent of a primary forest remnant patch. This field is only relevant when a polygon feature IS NOT available for the forest patch and no precise measurement of the total extent of the forest remnant is available. Possible values:<br>1 = 1-10 ha; 2 = 11-100 ha; 3 = 101-1000 ha; 4 = >1001 ha                                                                                                            |
| <b>DOMINANT_TREE_SPECIES1</b>              | Text          | Species (latin name) of the dominant tree species of the overstorey                                                                                                                                                                                                                                                                                                                                                                          |
| <b>DOMINANT_TREE_SPECIES2</b>              | Text          | Species (latin name) of the second dominant tree species of the overstorey (if any)                                                                                                                                                                                                                                                                                                                                                          |
| <b>DOMINANT_TREE_SPECIES3</b>              | Text          | Species (latin name) of the third dominant tree species of the overstorey (if any)                                                                                                                                                                                                                                                                                                                                                           |
| <b>THREAT_1</b>                            | Short Integer | Threat (if any) that is most likely to endanger the primary forest remnant. Possible values: 1 = Plantation development; 2 = Anthropogenic Fires; 3 = Tourism/recreation; 4 =Infrastructure development (including touristic); 5 = Mismanagement; 6 = Illegal logging; 7 = Timber and fuelwood extraction; 8 = Non-Timber Forest Products extraction; 9 = Urbanization and housing construction; 10 = Climate change; 11 = Biodiversity loss |
| <b>THREAT_2</b>                            | Short Integer | Threat (if any) that is most likely to endanger the primary forest remnant. See above for possible values.                                                                                                                                                                                                                                                                                                                                   |
| <b>LAST_DISTURBANCE1_TYPE</b>              | Text          | If known, type of the last disturbance event. Possible values: 1 = Fire, 2 = Windthrow; 3 = Flood; 4 = Landslide Avalanche; 5 = Logging\harvesting; 6 = Diseases\insect outbreak; 7 = OTHER natural; 8 = OTHER anthropogenic                                                                                                                                                                                                                 |
| <b>LAST_DISTURBANCE1_YEAR</b>              | Short Integer | Year when disturbance event 1 happened                                                                                                                                                                                                                                                                                                                                                                                                       |
| <b>LAST_DISTURBANCE1_INTENSITY</b>         | Short Integer | Intensity of disturbance event 1. Possible values: 1 = Light (<20% of the stand disturbed); 2 = Moderate (20-70% of the stand disturbed); 3 = Stand replacing (>70% of the stand disturbed)                                                                                                                                                                                                                                                  |
| <b>LAST_DISTURBANCE2_TYPE</b>              | Text          | If known, type of the penultimate disturbance event Possible values: see above                                                                                                                                                                                                                                                                                                                                                               |
| <b>LAST_DISTURBANCE2_YEAR</b>              | Short Integer | Year of disturbance event 2                                                                                                                                                                                                                                                                                                                                                                                                                  |
| <b>LAST_DISTURBANCE2_INTENSITY</b>         | Short Integer | Intensity of disturbance event 2 – Possible values: see above                                                                                                                                                                                                                                                                                                                                                                                |

|                             |               |                                                                                                                                                                                                                                                                                                                                                                                                                                                                                                                                   |
|-----------------------------|---------------|-----------------------------------------------------------------------------------------------------------------------------------------------------------------------------------------------------------------------------------------------------------------------------------------------------------------------------------------------------------------------------------------------------------------------------------------------------------------------------------------------------------------------------------|
| <b>PROTECTION_STATUS</b>    | Short Integer | Legal protection status of the forest stand as derived from the World Database of Protected <sup>74</sup> . The original IUCN classification was simplified to three classes: Strictly protected (IUCN category I); Protected (IUCN categories II-VI + not classified); Not protected. In case more updated/precise information was available from our data contributors, these were given priority. Possible values: 0 = Not protected; 1 = Protected; 2 = Strictly protected                                                    |
| <b>PROTECTED_SINCE</b>      | Short Integer | Year since the onset of legal protection, derived the same way as PROTECTION_STATUS, see above                                                                                                                                                                                                                                                                                                                                                                                                                                    |
| <b>RELEVANT_LITERATURE</b>  | Text          | Any relevant sources of information describing the forest remnant (including journal articles, local reports and websites)                                                                                                                                                                                                                                                                                                                                                                                                        |
| <b>CONTACT_PERSON</b>       | Text          | Name of the contact person providing the information on the stand                                                                                                                                                                                                                                                                                                                                                                                                                                                                 |
| <b>Notes</b>                | Text          | optional additional remarks to the forest polygon                                                                                                                                                                                                                                                                                                                                                                                                                                                                                 |
| <b>Source</b>               | Text          | Directly attributable source/ownership attribution of the forest remnant data                                                                                                                                                                                                                                                                                                                                                                                                                                                     |
| <b>ID_Dataset</b>           | Text          | ID of the data set (Table 2)                                                                                                                                                                                                                                                                                                                                                                                                                                                                                                      |
| <b>Priority</b>             | Integer       | An integer number describing the priority of the polygon in case of overlap across individual datasets. For polygons of lower priority, only the portion of polygon not overlapping with polygons with higher priority was included in the composite dataset. Polygons with priority=99 were not included in the composite dataset                                                                                                                                                                                                |
| <b>Area_ha</b>              | Float         | area of the forest polygon in ha                                                                                                                                                                                                                                                                                                                                                                                                                                                                                                  |
| <b>BIOGEOGRAPHIC_REGION</b> | Text          | as defined by the European Environmental Agency <sup>38</sup>                                                                                                                                                                                                                                                                                                                                                                                                                                                                     |
| <b>FOREST_TYPE1</b>         | Short Integer | Main forest type according to the forest categories defined by the European Environmental Agency <sup>75</sup> , based on the map of Potential Vegetation type for Europe <sup>76</sup> . Possible values: 1 = Boreal; 2 = Hemiboreal-nemoral; 3 = Alpine coniferous; 4 = Acidophilus oak-birch; 5 = Mesophytic deciduous; 6 = Lowland beech; 7 = Montane beech; 8 = Thermophilus deciduous; 9 = Broadleaved evergreen; 10 = Coniferous Mediterranean; 11 = Mire and swamp; 12 = Floodplain; 13 = Non-riverine Alder-birch-aspens |
| <b>FOREST_TYPE2</b>         | Short Integer | Second main forest type according to the forest categories defined by the European Environmental Agency <sup>75</sup> , based on the map of Potential Vegetation types for Europe <sup>76</sup> . See FOREST_TYPE1 for legend                                                                                                                                                                                                                                                                                                     |

---

|                     |       |                                                                                                                                                                                                                                                                                            |
|---------------------|-------|--------------------------------------------------------------------------------------------------------------------------------------------------------------------------------------------------------------------------------------------------------------------------------------------|
| <b>FOREST_SHARE</b> | Float | Actual share of the polygon covered by forest, assuming that primary forests in high naturalness classes, and having a large extent, may encompass land temporarily or permanently not covered by forest. Derived from high resolution maps of forest cover based on [ <sup>77,78</sup> ]. |
|---------------------|-------|--------------------------------------------------------------------------------------------------------------------------------------------------------------------------------------------------------------------------------------------------------------------------------------------|

---

240

### 241 *Technical Validation*

242           Although we had no direct control of the raw data contained in our database, the  
243 fact that all our information on primary forest locations derives either from peer-reviewed  
244 scientific literature, or were field-checked by trained researchers and/or professionals  
245 suggests high data reliability. We made sure to have a common understanding with data  
246 contributors about forest definitions [i.e., <sup>1,36</sup>], and only included a dataset in the EPFD if we  
247 could find an explicit equivalence with the forest definitions we used.

248           To further assess data reliability, we carried out a robustness check using the open-  
249 access Landsat archive and the LandTrendr disturbance detection algorithm<sup>101,102</sup>, both  
250 implemented in Google Earth Engine<sup>103</sup> (Figure 5). Specifically, we 1) quantified the  
251 proportion of polygons in our map, which underwent disturbance between 1985 and 2018,  
252 i.e., Landsat 5 operating time, 2) visually checked a subset of these disturbed polygons, to  
253 quantify the prevalence of anthropogenic vs. natural disturbance, and 3) extrapolated these  
254 results to the whole database to provide an estimation of the proportion of polygons in our  
255 map not meeting the necessary, but not sufficient, condition for being classified as primary  
256 (i.e. not being affected by anthropogenic disturbance within the last 35 years).

257           For each polygon contained in the map of primary forests, we extracted the whole  
258 stack of available Landsat images (~1985-today), and ran the LandTrendr<sup>104</sup> algorithm.  
259 LandTrendr identifies breakpoints in spectral time series, separates periods of disturbance or  
260 stability, and records the years in which disturbances occurred. To avoid problems due to  
261 cloud cover, changes in illumination, and atmospheric condition, we used all available  
262 images from the growing season of each year (1 May through 15 September) to derive yearly  
263 composite images<sup>105</sup>. As our spectral index, we used Tasseled Cap Wetness (TCW), as this  
264 index is particularly sensitive to forest structure<sup>106</sup>, is robust to spatial and temporal  
265 variations in canopy moisture<sup>107</sup>, and consistently outperforms other spectral indices,  
266 including Normalized Difference Vegetation Index<sup>104</sup>, for detecting forest  
267 disturbance<sup>101,108,109</sup>.

268           After running LandTrendr, we eliminated noise by applying a minimum disturbance  
269 threshold (2 ha). We then visually inspected a subset of primary forest polygons highlighted  
270 as 'disturbed' by LandTrendr. Based on the spectral and physical characteristics of the

271 disturbed patch (brightness, shape, size), and on ancillary information derived from very-  
272 high-resolution images available in Google Earth, we assigned disturbance agents as either  
273 anthropogenic (i.e., forest harvest, infrastructure development) or natural (e.g., windstorm,  
274 bark beetle outbreak, fire; Figure 6, Figure 7).  
275

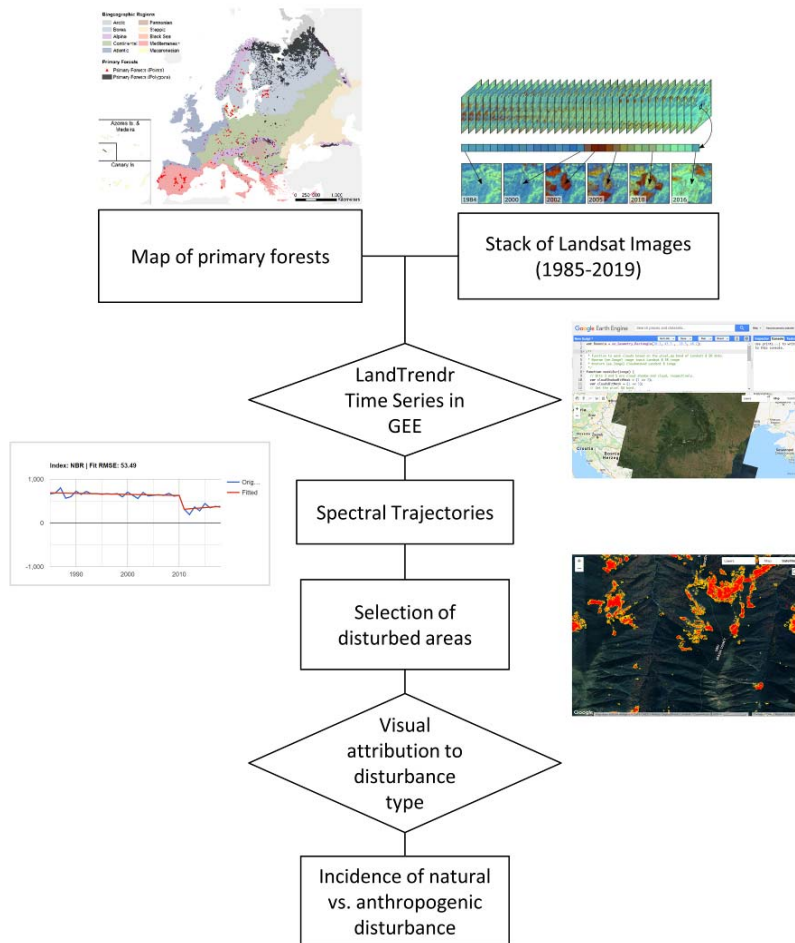

276

277 *Figure 5 – Workflow of the data robustness check.*

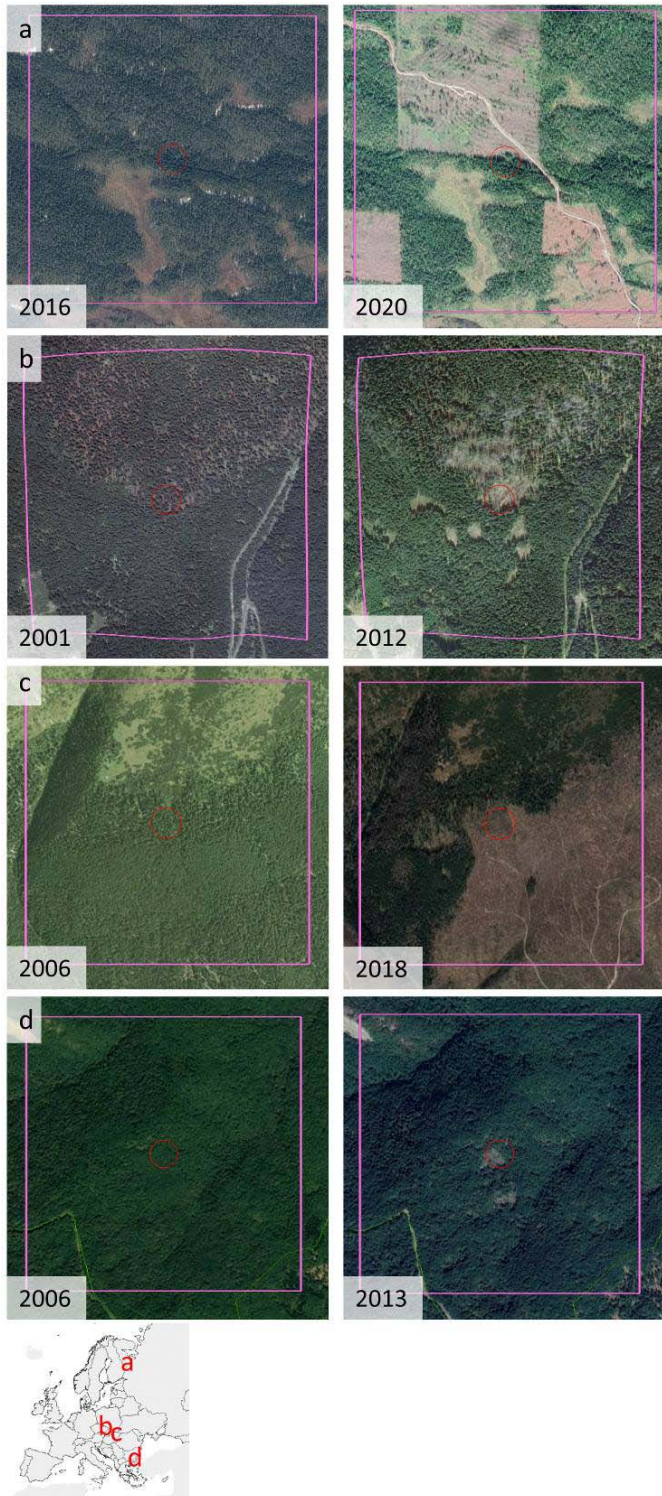

278

279

280

281

282

*Figure 6 - Examples of disturbed polygons, as detected by LandTrendr, before (left) and after (right) disturbance. a) clearcuts in the Russian Republic of Karelia; b) natural disturbance in Babia Gora, Slovakia; c) clear-cuts in Tatra National Park in Slovakia; d) natural disturbance in the southern Bourgas Province of Bulgaria. Red circles have a radius of 50 m; pink squares have a side of 1 km. Image credits: Google Earth.*

283 LandTrendr returned 4,734 polygons (27.3% of total) which experienced major  
284 disturbances between 1985 and 2018. The proportion of disturbed area was greater than  
285 10% in 2,904 polygons. We visually checked 20% of the disturbed polygons in each  
286 biogeographic region, up to a maximum of 100 polygons. Depending on the size of the  
287 polygons, we inspected up to 5 pixels with a minimum distance of 1km. As a result, we  
288 visually inspected a total of 712 pixels across 268 primary forest polygons, therefore  
289 validating 1.5% of the total number of polygons and 5.7% of the disturbed polygons. We  
290 attributed a total of 149 pixels, across 61 primary forest polygons, to anthropogenic  
291 disturbance, (i.e., 22.7%, standard error = 2.5%) of the polygons we checked (Table 4, Figure  
292 7). We thus estimated the total number of primary forest polygons being anthropogenically  
293 disturbed by multiplying the total number of polygons by the proportion of disturbed  
294 polygons (27.3%) and the share of these disturbed polygons attributed to anthropogenic  
295 causes (22.7%). This suggests our map contains 1,077 anthropogenically disturbed polygons  
296 (95% CIs [847, 1323]), which corresponds to 6.2% (95% CIs [4.9%, 7.6%]) of the total number  
297 of polygons. Disturbed polygons were concentrated in the Russian Federation (especially in  
298 Archangelsk region, Karelia and Komi republics), Southern Finland, and the Carpathians  
299 (Figure 7 ; Table 4). The Boreal and Alpine biogeographical regions had the highest number  
300 of disturbed polygons (both in total, and when considering only those with evident  
301 anthropogenic disturbance). The regions with the highest share of anthropogenically  
302 disturbed polygons was the Macaronesian, followed by the Continental and Boreal. Please  
303 note, that this robustness check should be considered as a low estimate, because only the  
304 disturbance events with a magnitude sufficient to be captured with LandTrendr and  
305 occurring in 1985-2018 could be identified.  
306

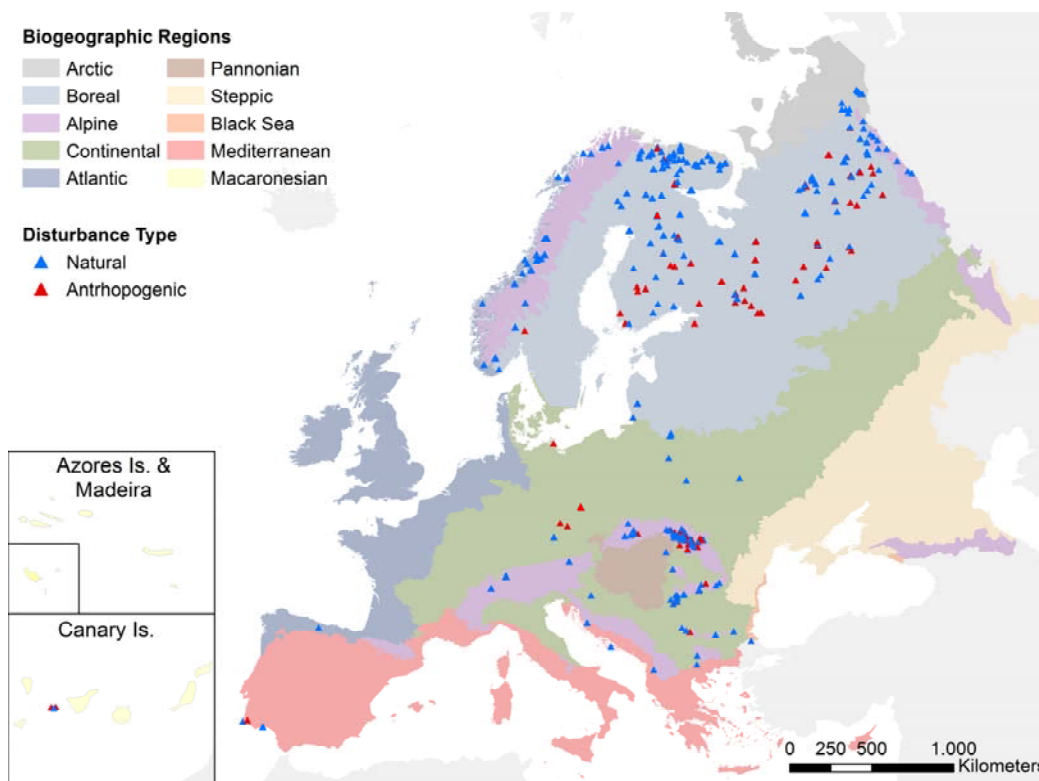

307

308 *Figure 7 - Geographical distribution of naturally vs. anthropogenically disturbed polygons, as resulting from a*  
 309 *visual check of 712 disturbed polygons.*

310

311 *Table 4 - Results of robustness check, summarized by biogeographical region. † The number of disturbed polygons*  
 312 *is higher than the number of polygons because some polygons expanding over more than one biogeographical*  
 313 *region are double counted. PF – Primary Forest.*

| Biogeographic region | Num. PF polygons (1) | Num. disturbed PF polygons (2) | Num. disturbed PF polygons checked (3) | Num. of (3) with evident anthropogenic disturbance (4) | Share of (3) anthropogenically disturbed (4/3) % |
|----------------------|----------------------|--------------------------------|----------------------------------------|--------------------------------------------------------|--------------------------------------------------|
| Alpine               | 11,734               | 1,096                          | 102                                    | 23                                                     | 22.55                                            |
| Arctic               | 96                   | 105 <sup>†</sup>               | 20                                     | 0                                                      | 0.00                                             |
| Atlantic             | 83                   | 48                             | 13                                     | 0                                                      | 0.00                                             |
| Black Sea            | 19                   | 6                              | 1                                      | 0                                                      | 0.00                                             |
| Boreal               | 4,074                | 3,334                          | 110                                    | 30                                                     | 27.27                                            |
| Continental          | 1,100                | 105                            | 21                                     | 6                                                      | 28.57                                            |
| Macaronesia          | 27                   | 8                              | 2                                      | 1                                                      | 50.00                                            |
| Mediterranean        | 132                  | 27                             | 5                                      | 1                                                      | 20.00                                            |
| Pannonian            | 39                   | 4                              | 1                                      | 0                                                      | 0.00                                             |
| Steppic              | 5                    | 1                              | 0                                      | 0                                                      | 0.00                                             |

314

## 315 *Usage Notes*

316 All data files are referenced in a geographic coordinate system (lat/long, WGS 84 - EPSG  
317 code: 4326). The provided files are in an ESRI personal geodatabase, and can be accessed  
318 and displayed using standard GIS software such as: QGIS ([www.qgis.org/en](http://www.qgis.org/en)).

319 All datasets listed in Table 2 as open-access are freely available in Figshare (*the link*  
320 *will be provided upon submission*) with a Creative Commons CC BY 4.0 license. Access to the  
321 confidential datasets can be possible but must be negotiated with respective copyright  
322 holders. Comments and requests of updates for the dataset are collected and discussed in  
323 the GitHub forum: <https://github.com/fmsabatini/PrimaryForestEurope>.

324

## 325 *Code Availability*

326 The code to reproduce the post-processing is available in Figshare (*the link will be provided*  
327 *upon submission*). The dataset contains five scripts.

- 328 • *00\_ComposeMap.R* – Identifies overlapping polygons across individual datasets
- 329 • *01\_CreateComposite\_Points.py* – creates the composite point feature class.
- 330 • *02\_CreateComposite\_Polygons.py* – creates the composite polygon feature class.
- 331 • *03\_PostProcessing.R* – Extract additional information on each primary forest
- 332 • *04\_Add\_Postprocessing.py* – Imports post-processing output into the geodatabase
- 333 • *05\_Summary\_stats.R* – Calculates summary statistics of primary forests

334 Python (.py) scripts were run in ESRI ArcGIS (v10.5) and are available also as ArcGIS Models  
335 inside the Geodatabase. The remaining (.R) scripts were run using R (v4.0).

336

337

## 338 *Acknowledgements*

339 This project was funded by Frankfurt Zoological Society (FZS; project ETN-WIE-FZS-001) and  
340 the European Commission (Marie Skłodowska-Curie fellowship to FMS, project FORESTS &  
341 CO, #658876). The Italian dataset was supported by funding from the Department for Nature  
342 Protection of the Italian Ministry of the Environment, Land and Sea Protection. The GEVFP's  
343 French dataset was supported by funding from EU, RF and 'Conseil Régional Midi-Pyrénées'.  
344 MM gratefully acknowledges the institutional project EVA No.CZ.02.1.01/  
345 0.0/0.0/16\_019/0000803 and MŠMT project LTT20016. This work would not have been  
346 possible without all those who responded to the questionnaires and those who collected all  
347 the data presented here. A special thanks goes to all data contributors, especially those who  
348 are not coauthors of this paper (in alphabetic order): Paloma Hannonen (Dataset 39), Matti



349 Liimatainen (Dataset 38), Simone Mayrhofer (Dataset 49), Daniel Vallauri (Dataset 13) and  
350 Juraj Vysoky (Dataset 26). We also thank Teresa De Marzo for support during the validation  
351 process.

352

### 353 *Author contributions*

354 The original idea for the database is from FMS, TK and ZK. FMS and HB harmonized the  
355 datasets, and conducted the literature review. DA, JAA, EB, SB, EC, AD, IMD, ABF, MG, NG,  
356 FH, SK, MK, AKi, AKr, PLI, LL, FL, BM, RNM, PM, SM, RM, MM, GM, MP, RP, LN, AR, MS, BS, JS,  
357 DS, JS, O-PT, ET, RV, TV, MW, MY, TZ, AZ contributed data. FMS, HB, and TK created the first  
358 draft of the manuscript and all co-authors contributed substantially to its revision.

359

### 360 *Competing interests*

361 The authors declare no competing financial interests.

362

### 363 *References*

- 364 1     FAO. *Global Forest Resources Assessment 2015. Terms and definitions*. (FAO, 2015).  
365 2     Lansstyrelsen. Formellt skyddad skogi Norrbottens län. Report No. 0283-9636,  
366     (2018).  
367 3     Watson, J. E. M. *et al.* The exceptional value of intact forest ecosystems. *Nat. Eco.*  
368     *Evo.*, 1 (2018).  
369 4     European Commission. in *COM(2020) 380 final* (Brussels, 2020).  
370 5     Vandekerhove, K. *et al.* Reappearance of Old-Growth Elements in Lowland  
371     Woodlands in Northern Belgium: Do the Associated Species Follow? *Silva Fenn.* **45**,  
372     909-935, doi:10.14214/sf.78 (2011).  
373 6     Di Marco, M., Ferrier, S., Harwood, T. D., Hoskins, A. J. & Watson, J. E. Wilderness  
374     areas halve the extinction risk of terrestrial biodiversity. *Nature*, 1-4 (2019).  
375 7     Ahlkrona, E., Giljam, C., Kesketalo, C., Klein, J. & Naumov, V. Precisera kartering av  
376     kontinuitetsskog i Västernorrlands län. Metria AB på uppdrag av Naturvårdsverket.  
377     (2017).  
378 8     Frey, S. J. K. *et al.* Spatial models reveal the microclimatic buffering capacity of old-  
379     growth forests. *Science Advances* **2**, e1501392, doi:10.1126/sciadv.1501392 (2016).  
380 9     Zhou, G. Y. *et al.* Old-growth forests can accumulate carbon in soils. *Science* **314**,  
381     1417-1417, doi:10.1126/science.1130168 (2006).  
382 10    Burrascano, S., Keeton, W. S., Sabatini, F. M. & Blasi, C. Commonality and variability  
383    in the structural attributes of moist temperate old-growth forests: A global review.  
384    *For. Ecol. Manag.* **291**, 458-479, doi:<http://dx.doi.org/10.1016/j.foreco.2012.11.020>  
385    (2013).  
386 11    Bauhus, J., Puettmann, K. & Messier, C. Silviculture for old-growth attributes. *For.*  
387    *Ecol. Manag.* **258**, 525-537, doi:10.1016/j.foreco.2009.01.053 (2009).  
388 12    Moore, K. D. In the shadow of the cedars: the spiritual values of old-growth forests.  
389    *Conserv. Biol.* **21**, 1120-1123 (2007).  
390 13    FOREST EUROPE. State of Europe's Forests 2015. (Ministerial Conference on the  
391    Protection of Forests in Europe, Madrid, 2015).

- 392 14 Ceccherini, G. *et al.* Abrupt increase in harvested forest area over Europe after 2015.  
393 *Nature* **583**, 72-77, doi:10.1038/s41586-020-2438-y (2020).
- 394 15 Levers, C. *et al.* Drivers of forest harvesting intensity patterns in Europe. *For. Ecol.*  
395 *Manag.* **315**, 160-172 (2014).
- 396 16 Potapov, P. *et al.* The last frontiers of wilderness: Tracking loss of intact forest  
397 landscapes from 2000 to 2013. *Science Advances* **3**, doi:10.1126/sciadv.1600821  
398 (2017).
- 399 17 Schickhofer, M. & Schwarz, U. *Inventory of Potential Primary and Old-Growth Forest*  
400 *Areas in Romania (PRIMOFARO). Identifying the largest intact forests in the*  
401 *temperate zone of the European Union.* (Euronatur Foundation, 2019).
- 402 18 Knorn, J. *et al.* Continued loss of temperate old-growth forests in the Romanian  
403 Carpathians despite an increasing protected area network. *Environ. Conserv.* **40**, 182-  
404 193 (2013).
- 405 19 Vol. Judgment of the Court (Grand Chamber) of 17 April 2018 (Court of Justice of  
406 the European Union, 2018).
- 407 20 Chylarecki, P. & Selva, N. Ancient forest: spare it from clearance. *Nature* **530**, 419-  
408 419 (2016).
- 409 21 Earthsight. Complicit in corruption. How billion-dollar firms and EU governments are  
410 failing Ukraine's forests. (Earthsight, 2018).
- 411 22 Mikoláš, M. *et al.* Primary forest distribution and representation in a Central  
412 European landscape: Results of a large-scale field-based census. *For. Ecol. Manag.*  
413 **449**, 117466, doi:<https://doi.org/10.1016/j.foreco.2019.117466> (2019).
- 414 23 Hance, J. & But, S. s. IKEA Logging Old-growth Forest for Low-price Furniture in  
415 Russia. (2012). <<https://news.mongabay.com/2012/05/ikea-logging-old-growth-forest-for-low-price-furniture-in-russia/>>.
- 416 24 Sabatini, F. M. *et al.* Protection gaps and restoration opportunities for primary  
417 forests in Europe. *Divers. Distrib.* **n/a**, doi:10.1111/ddi.13158 (2020).
- 418 25 Sabatini, F. M. *et al.* Protection gaps and restoration opportunities for primary  
419 forests in Europe. *Divers. Distrib.* (2020).
- 420 26 Adam, D. & Vrška, T. in *Landscape Atlas of the Czech Republic* (eds T Hrnčiarová, P  
421 Mackovčín, & I Zvara) 209 (Ministry of Environment and Silva Tarouca Research  
422 Institute, Prague–Silva Tarouca Research Institute for Landscape and Ornamental  
423 Gardening, 2009).
- 424 27 Bernadzki, E., Bolibok, L., Brzeziecki, B., Ząjaczkowski, J. & Zybura, H. Compositional  
425 dynamics of natural forests in the Białowieża National Park, northeastern Poland. *J.*  
426 *Veg. Sci.* **9**, 229-238 (1998).
- 427 28 Hobi, M. L., Commarmot, B. & Bugmann, H. Pattern and process in the largest  
428 primeval beech forest of Europe (Ukrainian Carpathians). *J. Veg. Sci.* **26**, 323-336  
429 (2015).
- 430 29 Kral, K. *et al.* Local variability of stand structural features in beech dominated natural  
431 forests of Central Europe: Implications for sampling. *For. Ecol. Manag.* **260**, 2196-  
432 2203, doi:10.1016/j.foreco.2010.09.020 (2010).
- 433 30 Veen, P. *et al.* Virgin forests in Romania and Bulgaria: results of two national  
434 inventory projects and their implications for protection. *Biodivers. Conserv.* **19**, 1805-  
435 1819, doi:10.1007/s10531-010-9804-2 (2010).
- 436 31 Ibisch, P. L. & Ursu, A. (Greenpeace CEE Romania; Centre for Ecnics and  
437 Ecosystem Management, Eberswalde University for Sustainable Development;  
438 Geography Department, A. I. Cuza University of Iași, 2017).
- 439 32 Spracklen, B. D. & Spracklen, D. V. Identifying European Old-Growth Forests using  
440 Remote Sensing: A Study in the Ukrainian Carpathians. *Forests* **10**, 127 (2019).
- 441

- 442 33 Diaci, J. in *Proceedings of the invited lecturers' reports presented at the COST E4*  
443 *management committee and working groups meeting in Ljubljana, Slovenia.*  
444 (Department of Forestry and Renewable Forest Resources Biotechnical Faculty).  
445 34 Frank, G. *et al.* *COST Action E27. Protected Forest Areas in Europe-analysis and*  
446 *harmonisation (PROFOR): results, conclusions and recommendations.* (Federal  
447 Research and Training Centre for Forests, Natural Hazards and Landscape (BFW),  
448 2007).  
449 35 Sabatini, F. M. *et al.* Where are Europe's last primary forests? *Divers. Distrib.* **24**,  
450 1426-1439, doi:10.1111/ddi.12778 (2018).  
451 36 Buchwald, E. in *Proceedings: Third expert meeting on harmonizing forest-related*  
452 *definitions for use by various stakeholders* (Food and Agriculture Organization of the  
453 United Nations, 2005).  
454 37 Trotsiuk, V. *et al.* A mixed severity disturbance regime in the primary *Picea abies* (L.)  
455 Karst. forests of the Ukrainian Carpathians. *For. Ecol. Manag.* **334**, 144-153,  
456 doi:<http://dx.doi.org/10.1016/j.foreco.2014.09.005> (2014).  
457 38 Kozák, D. *et al.* Profile of tree-related microhabitats in European primary beech-  
458 dominated forests. *For. Ecol. Manag.* **429**, 363-374 (2018).  
459 39 Svoboda, M. *et al.* Landscape-level variability in historical disturbance in primary  
460 *Picea abies* mountain forests of the Eastern Carpathians, Romania. *J. Veg. Sci.* **25**,  
461 386-401, doi:10.1111/jvs.12109 (2014).  
462 40 Garbarino, M. *et al.* Gap disturbances and regeneration patterns in a Bosnian old-  
463 growth forest: a multispectral remote sensing and ground-based approach. *Ann. For.*  
464 *Sci.* **69**, 617-625, doi:10.1007/s13595-011-0177-9 (2012).  
465 41 Keren, S. *et al.* Comparative Structural Dynamics of the Janj Mixed Old-Growth  
466 Mountain Forest in Bosnia and Herzegovina: Are Conifers in a Long-Term Decline?  
467 *Forests* **5**, 1243-1266 (2014).  
468 42 Motta, R. *et al.* Structure, spatio-temporal dynamics and disturbance regime of the  
469 mixed beech–silver fir–Norway spruce old-growth forest of Biogradska Gora  
470 (Montenegro). *Plant Biosyst.* **149**, 966-975, doi:10.1080/11263504.2014.945978  
471 (2015).  
472 43 Motta, R. *et al.* Development of old-growth characteristics in uneven-aged forests of  
473 the Italian Alps. *Eur. J. For. Res.* **134**, 19-31, doi:10.1007/s10342-014-0830-6 (2015).  
474 44 WWF Bulgaria. *Forests in Bulgaria - Old growth forests*,  
475 <<https://gis.wwf.bg/mobilz/en/#>>.  
476 45 Panayotov, M. *et al.* *Mountain coniferous forests in Bulgaria – structure and natural*  
477 *dynamics.* (University of Forestry and Geosoft, 2016).  
478 46 Blue Cat Team. *Czech Natural Forests Databank*,  
479 <<https://www.naturalforests.cz/czech-natural-forests-databank>>.  
480 47 Löhmus, A. & Kraut, A. Stand structure of hemiboreal old-growth forests:  
481 Characteristic features, variation among site types, and a comparison with FSC-  
482 certified mature stands in Estonia. *For. Ecol. Manag.* **260**, 155-165,  
483 doi:<http://dx.doi.org/10.1016/j.foreco.2010.04.018> (2010).  
484 48 EEA. *Developing a forest naturalness indicator for Europe. Concept and methodology*  
485 *for a high nature value (HNV) forest indicator.* (EEA Technical report No 13/2014,  
486 Luxembourg: Publications Office of the European Union, 2014).  
487 49 SYKE. *Finnish Environment Institute*, <[http://www.syke.fi/en-US/Open\\_information](http://www.syke.fi/en-US/Open_information)>.  
488 50 Rossi, M., Bardin, P., Cateau, E. & Vallauri, D. Forêts anciennes de Méditerranée et  
489 des montagnes limitrophes: références pour la naturalité régionale. *WWF France*,  
490 *Marseille, France*, 144 (2013).  
491 51 WWF France. *Hauts lieux de naturalité en France*,  
492 <<http://www.foretsanciennes.fr/protger-mieux/france/>>.

- 493 52 Cateau, E. *et al.* *Le patrimoine forestier des réserves naturelles. Focus sur les forêts à*  
494 *caractère naturel*. Vol. cahier n° 7 (Réserves Naturelles de France, 2017).
- 495 53 Bundesanstalt für Landwirtschaft und Ernährung. *Datenbank Naturwaldreservate in*  
496 *Deutschland*, <<https://www.naturwaelder.de/index.php?tpl=home>>.
- 497 54 Blasi, C., Burrascano, S., Maturani, A. & Sabatini, F. M. *Old-growth forests in Italy*.  
498 (Palombi Editori, 2010).
- 499 55 Myhre, T. Skogkur 2020. redningsplan for Norges unike skoger. *WWF Verdens*  
500 *villmarksfond, Norges naturvernforbund, SABIMA* (2012).
- 501 56 WWF Romania. *Harta ariilor protejate din Romania*,  
502 <<http://www.lemncontrolat.ro/en/home/>>.
- 503 57 PRALESY.SK. *Mapovanie pralesov Slovenska*, <<http://en.pralesy.sk/>>.
- 504 58 Slovenia Forest Service. *Gozdni rezervati*,  
505 <[http://www.zgs.si/gozdovi\\_slovenije/o\\_gozdovih\\_slovenije/gozdni\\_rezervati/index.html](http://www.zgs.si/gozdovi_slovenije/o_gozdovih_slovenije/gozdni_rezervati/index.html)>.
- 506
- 507 59 Ruete, A., Snäll, T. & Jönsson, M. Dynamic anthropogenic edge effects on the  
508 distribution and diversity of fungi in fragmented old-growth forests. *Ecol. Appl.* **26**,  
509 1475-1485, doi:10.1890/15-1271 (2016).
- 510 60 Heiri, C., Wolf, A., Rohrer, L., Brang, P. & Bugmann, H. Successional pathways in  
511 Swiss mountain forest reserves. *Eur. J. For. Res.* **131**, 503-518 (2012).
- 512 61 Brang, P., Heiri, C. & Bugmann, H. *Waldreservate: 50 Jahre natürliche*  
513 *Waldentwicklung in der Schweiz*. (Haupt, 2011).
- 514 62 WWF Ukraine. *Virgin, Old-Growth and Natural Forests of Ukraine*, <<http://gis-wwf.com.ua/>>.
- 515
- 516 63 Ministerului Apelor și Pădurilor. *Catalogul pădurilor virgine și cvasivirgine din*  
517 *România*, <<http://apepaduri.gov.ro/paduri-virgine/>>.
- 518 64 UNEP-WCMC & IUCN. *Protected Planet: Ancient and Primeval Beech Forests of the*  
519 *Carpathians and Other Regions of Europe in Albania, Austria, Belgium, Bulgaria,*  
520 *Croatia, Germany, Italy, Romania, Slovakia, Slovenia, Spain and Ukraine, The World*  
521 *Database on Protected Areas (WDPA)/The Global Database on Protected Areas*  
522 *Management Effectiveness (GD-PAME)*, <<https://www.protectedplanet.net/903141>>  
523 (2019).
- 524 65 Britz, H. *et al.* Nomination of the “Ancient Beech Forests of Germany” as Extension to  
525 the World Natural heritage “Primeval Beech Forests of the Carpathians”. *Nationale*  
526 *Naturlandschaften, Federal Republic of Germany. Nieden-stein: Specialised editing*  
527 *Cognitio Kommunikation & Planung* (2009).
- 528 66 Alterra. *Forest reserves*, <<https://www.wur.nl/en/Research-Results/Projects-and-programmes/Humus-forms/Publications-Humus-forms/Forest-reserves.htm>>  
529 (2000).
- 530
- 531 67 Pantić, D. *et al.* Structural, production and dynamic characteristics of the strict forest  
532 reserve 'Račanska šljivovica' on Mt. Tara. *Glasnik Šumarskog fakulteta*, 93-114 (2011).
- 533 68 Savoie, J. M. *et al.* *Vieilles forêts pyrénéennes de Midi-Pyrénées. Deuxième phase.*  
534 *Evaluation et cartographie des sites. Recommandations. Rapport final*. (Ecole  
535 d'Ingénieurs de PURPAN/DREAL Midi-Pyrénées, 2015).
- 536 69 Savoie, J. M. *et al.* Forêts pyrénéennes anciennes de Midi-Pyrénées. Rapport  
537 d'Etude de projet FEDER 2008-2011. 320 (Ecole d'Ingénieurs de PURPAN/DREAL  
538 Midi-Pyrénées, 2011).
- 539 70 WWF Finland. *Kansallisomaisuus turvaan - valtion omistamia suojelun arvoisia*  
540 *metsä- ja suoalueita.*, (WWF Suomen raportteja, 2012).
- 541 71 Kitenberga, M. *et al.* A mixture of human and climatic effects shapes the 250-year  
542 long fire history of a semi-natural pine dominated landscape of Northern Latvia. *For.*  
543 *Ecol. Manag.* **441**, 192-201 (2019).

- 544 72 Baders, E., Senhofa, S., Purina, L. & Jansons, A. Natural succession of Norway spruce  
545 stands in hemiboreal forests: case study in Slitere national park, Latvia. *Baltic*  
546 *Forestry* **23**, 522-528 (2017).
- 547 73 Kokarēviča, I. *et al.* Vegetation changes in boreo-nemoral forest stands depending  
548 on soil factors and past land use during an 80 year period of no human impact. *Can.*  
549 *J. For. Res.* **46**, 376-386 (2016).
- 550 74 Fernandez López, A. B. Parque Nacional de Garajonay, Patrimonio Mundial.  
551 (Organismo Autonomo Parques Nacionales, 2009).
- 552 75 TRAGSATEC. Segundo inventario ecológico del Parque Nacional de Garajonay.  
553 (Parque Nacional de Garajonay, 2006).
- 554 76 Fernández, A. B. & Gómez, L. Qué son los bosques antiguos de laurisilva. Su valor y  
555 situación en Canarias. *La Gomera, entre bosques y taparuchas*, 177-236 (2016).
- 556 77 BIO FOKUS. *Narin lokalitetsdatabas*, <<https://biofokus.no/narin/>>.
- 557 78 Matović, B. *et al.* Comparison of stand structure in managed and virgin european  
558 beech forests in Serbia. *Šumarski list* **142**, 47-57 (2018).
- 559 79 Kiš, A., Stojšić, V., & Dinić, A. in *2nd International Symposium on Nature*  
560 *Conservation. Proceedings* 373-382 (Institute for Nature Conservation of Vojvodina  
561 Province, Novi Sad, 2016).
- 562 80 Potapov, P. *et al.* Mapping the world's intact forest landscapes by remote sensing.  
563 *Ecol. Soc.* **13** (2008).
- 564 81 Kobayakov, K. & Jakolev, J. Atlas of high conservation value areas, and analysis of gaps  
565 and representativeness of the protected area network in northwest Russia. *Finnish*  
566 *Environment Institute* (2013).
- 567 82 Europarc Spain. *Mapa de rodales de referencia RedBosques*, <[www.redbosques.eu/](http://www.redbosques.eu/)> (  
568 83 Diku, A. & Shuka, L. *Pyjet e vjetër të ahut në shqipëri (Old Beech forests in Albania)*.  
569 (PSEDA - ILIRIA <<http://iliria-al.org/publications/>>, 2017).
- 570 84 Burrascano, S. *et al.* It's a long way to the top: Plant species diversity in the transition  
571 from managed to old-growth forests. *J. Veg. Sci.* **29**, 98-109, doi:10.1111/jvs.12588  
572 (2018).
- 573 85 EEA. (ed Directorate-General for Environment (DG ENV) Council of Europe (CoE))  
574 (2016).
- 575 86 UNEP-WCMC & IUCN. *Protected Planet: The World Database on Protected Areas*  
576 *(WDPA)* <[www.protectedplanet.net](http://www.protectedplanet.net)> (2019).
- 577 87 Bohn, U. *et al.* Map of the natural vegetation of Europe. Explanatory text with CD-  
578 ROM., (German Federal Agency for Nature Conservation, Bonn, Germany, 2003).
- 579 88 Hansen, M. C. *et al.* High-resolution global maps of 21st-century forest cover change.  
580 *Science* **342**, 850-853, doi:10.1126/science.1244693 (2013).
- 581 89 R: A language and environment for statistical computing v. 3.6.1 (R Foundation for  
582 Statistical Computing, Vienna, Austria., 2019).
- 583 90 FOREST EUROPE. *Quantitative Indicators Country reports 2015*,  
584 <[https://foresteurope.org/state-europes-forests-2015-report/#1476295965372-](https://foresteurope.org/state-europes-forests-2015-report/#1476295965372-d3bb1dd0-e9a0)  
585 [d3bb1dd0-e9a0](https://foresteurope.org/state-europes-forests-2015-report/#1476295965372-d3bb1dd0-e9a0)> (2015).
- 586 91 Skogsstyrelsen. *Key Woodland Habitats*, <<https://www.skogsstyrelsen.se/>> (2003).
- 587 92 Frank, A. *Inventering av nyckelbiotoper: resultat till och med 2003*. (Skogsstyr.,  
588 2004).
- 589 93 Länsstyrelsen Västerbotten. *LstAC Skogar med höga naturvärden ovan gränsen för*  
590 *fjällnära skog 2003-2015*, <[https://ext-](https://ext-geodatakatalog.lansstyrelsen.se/GeodataKatalogen/)  
591 [geodatakatalog.lansstyrelsen.se/GeodataKatalogen/](https://ext-geodatakatalog.lansstyrelsen.se/GeodataKatalogen/)> (2019).
- 592 94 Naturvårdsverket. *Skyddsvärda statliga skogar*, <[http://mdp.vic-](http://mdp.vic-metria.nu/miljodataportalen/GetMetaDataById?UUID=3919E66E-2E09-440D-9171-B5074DF0C0ED)  
593 [metria.nu/miljodataportalen/GetMetaDataById?UUID=3919E66E-2E09-440D-9171-](http://mdp.vic-metria.nu/miljodataportalen/GetMetaDataById?UUID=3919E66E-2E09-440D-9171-B5074DF0C0ED)  
594 [B5074DF0C0ED](http://mdp.vic-metria.nu/miljodataportalen/GetMetaDataById?UUID=3919E66E-2E09-440D-9171-B5074DF0C0ED)> (2017).

- 595 95 Naturvårdsverket. *Skogliga värdekärnor*, <[http://gpt.vic-](http://gpt.vic-metria.nu/data/land/skogliga_vardekarnor_2016.zip)  
596 [metria.nu/data/land/skogliga\\_vardekarnor\\_2016.zip](http://gpt.vic-metria.nu/data/land/skogliga_vardekarnor_2016.zip)> (2016).
- 597 96 Naturvårdsverket. *Preciserad kartering av kontinuitetsskog i Jämtlands län*,  
598 <[http://gpt.vic-metria.nu/data/land/Preciserad\\_kskog\\_jamtland.zip](http://gpt.vic-metria.nu/data/land/Preciserad_kskog_jamtland.zip)> (2019).
- 599 97 Ahlkrona, E., Giljam, C. & Wennberg, S. Kartering av kontinuitetsskogi boreal region.  
600 Metria AB på uppdrag av Naturvårdsverket., (2017).
- 601 98 Naturvårdsverket. *Skyddad fjällbarrskog*, <[https://gpt.vic-](https://gpt.vic-metria.nu/data/land/NMD/Skyddad_Fjallbarrskog.zip)  
602 [metria.nu/data/land/NMD/Skyddad\\_Fjallbarrskog.zip](https://gpt.vic-metria.nu/data/land/NMD/Skyddad_Fjallbarrskog.zip)> (2019).
- 603 99 Skogsstyrelsen. *Utförda avverkningar*, <<https://www.skogsstyrelsen.se/>> (2014).
- 604 100 Miljødirektoratet. (2016).
- 605 101 Cohen, W. B., Yang, Z., Healey, S. P., Kennedy, R. E. & Gorelick, N. A LandTrendr  
606 multispectral ensemble for forest disturbance detection. *Remote Sens. Environ.* **205**,  
607 131-140 (2018).
- 608 102 Kennedy, E. R. *et al.* Implementation of the LandTrendr Algorithm on Google Earth  
609 Engine. *Remote Sensing* **10**, doi:10.3390/rs10050691 (2018).
- 610 103 Gorsevski, V., Geores, M. & Kasischke, E. Human dimensions of land use and land  
611 cover change related to civil unrest in the Imatong Mountains of South Sudan. *Appl.*  
612 *Geogr.* **38**, 64-75, doi:10.1016/j.apgeog.2012.11.019 (2013).
- 613 104 Kennedy, R. E., Yang, Z. & Cohen, W. B. Detecting trends in forest disturbance and  
614 recovery using yearly Landsat time series: 1. LandTrendr—Temporal segmentation  
615 algorithms. *Remote Sens. Environ.* **114**, 2897-2910 (2010).
- 616 105 Griffiths, P., Van Der Linden, S., Kuemmerle, T. & Hostert, P. A pixel-based landsat  
617 compositing algorithm for large area land cover mapping *IEEE Journal of Selected*  
618 *Topics in Applied Earth Observations and Remote Sensing* **6**, 2088-2101 (2013).
- 619 106 Cohen, W. B. & Spies, T. A. Estimating structural attributes of Douglas-fir/western  
620 hemlock forest stands from Landsat and SPOT imagery. *Remote Sens. Environ.* **41**, 1-  
621 17 (1992).
- 622 107 Czerwinski, C. J., King, D. J. & Mitchell, S. W. Mapping forest growth and decline in a  
623 temperate mixed forest using temporal trend analysis of Landsat imagery, 1987–  
624 2010. *Remote Sens. Environ.* **141**, 188-200 (2014).
- 625 108 Cohen, W. B., Yang, Z. & Kennedy, R. Detecting trends in forest disturbance and  
626 recovery using yearly Landsat time series: 2. TimeSync—Tools for calibration and  
627 validation. *Remote Sens. Environ.* **114**, 2911-2924 (2010).
- 628 109 Grogan, K., Pflugmacher, D., Hostert, P., Kennedy, R. & Fensholt, R. Cross-border  
629 forest disturbance and the role of natural rubber in mainland Southeast Asia using  
630 annual Landsat time series. *Remote Sens. Environ.* **169**, 438-453 (2015).
- 631
